# Supplementary material for: High-Order Degree and Combined Degree in Complex Networks
Source: Hindawi journal article supplement (doi:10.1155/2018/4925841), 2018-06-27
Supplement: f1 [file 4925841.f1.pdf]

## Supplementary Table 1

In the Random Network, we increase the value of  $p$ , and show the discrimination of degree, 2-order degree, and 4-order degree, with the number of nodes  $n$  and initial connection edges  $d$  change over 27 cases.

|        |        |            | degree    | 2-order degree | 4-order degree |
|--------|--------|------------|-----------|----------------|----------------|
| n=5000 | p=0.01 | std        | 7.0474    | 362.56         | 9.60E+05       |
|        |        | alpha=0.9  | 0.4336    | 0.4546         | 0.4638         |
|        |        | alpha=0.92 | 0.523     | 0.5568         | 0.5628         |
|        | p=0.05 | std        | 15.34     | 3845.3         | 2.43E+08       |
|        |        | alpha=0.9  | 0.087     | 0.0908         | 0.0916         |
|        |        | alpha=0.92 | 0.1704    | 0.1752         | 0.1762         |
|        | p=0.1  | std        | 2.15E+01  | 10736          | 2.69E+09       |
|        |        | alpha=0.9  | 0.0144    | 0.0152         | 0.0152         |
|        |        | alpha=0.92 | 0.0482    | 0.0506         | 0.0506         |
| n=7500 | p=0.01 | std        | 8.544     | 652.23         | 3.81E+06       |
|        |        | alpha=0.9  | 0.35173   | 0.3608         | 0.36733        |
|        |        | alpha=0.92 | 0.44813   | 0.47013        | 0.476          |
|        | p=0.05 | std        | 19.021    | 7141.1         | 1.01E+09       |
|        |        | alpha=0.9  | 0.039733  | 0.037733       | 0.36733        |
|        |        | alpha=0.92 | 0.095867  | 0.098933       | 0.099733       |
|        | p=0.1  | std        | 26.169    | 19649          | 1.11E+10       |
|        |        | alpha=0.9  | 0.0022667 | 0.0021333      | 0.0022667      |
|        |        | alpha=0.92 | 0.0164    | 0.0168         | 0.017067       |
| n=9000 | p=0.01 | std        | 9.3855    | 859.99         | 7.22E+06       |
|        |        | alpha=0.9  | 0.31689   | 0.31689        | 0.32167        |
|        |        | alpha=0.92 | 0.39711   | 0.42244        | 0.42678        |
|        | p=0.05 | std        | 20.674    | 9320.8         | 1.90E+09       |
|        |        | alpha=0.9  | 0.023     | 0.023          | 0.023444       |
|        |        | alpha=0.92 | 0.069444  | 0.069556       | 0.069889       |
|        | p=0.1  | std        | 28.652    | 25827          | 2.10E+10       |
|        |        | alpha=0.9  | 0.0013333 | 0.0013333      | 0.0013333      |
|        |        | alpha=0.92 | 0.009     | 0.0091111      | 0.0092222      |
