# Supplementary material for: High-Order Degree and Combined Degree in Complex Networks
Source: Hindawi journal article supplement (doi:10.1155/2018/4925841), 2018-06-27
Supplement: f3 [file 4925841.f3.pdf]

**Supplementary Table 3**

In the undirected scale free network, the discrimination results of various orders of degree, with initial number of nodes  $n$ , initial node connection probability  $p$ , running times  $t$ , and the new node added to the network each time has a degree of  $m$ .

|               |              |            | degree   | 2-order degree | 4-order degree |
|---------------|--------------|------------|----------|----------------|----------------|
| n=100, t=1900 | p=0.05, m=5  | std        | 8.2407   | 120.8          | 3.39E+04       |
|               |              | alpha=0.20 | 0.0095   | 0.0075         | 9.50E-03       |
|               |              | alpha=0.25 | 0.0165   | 0.0135         | 1.90E-02       |
|               |              | alpha=0.30 | 0.0295   | 0.037          | 5.25E-02       |
|               |              | alpha=0.35 | 0.0415   | 0.0755         | 9.30E-02       |
|               |              | alpha=0.40 | 0.055    | 0.1155         | 1.40E-01       |
|               |              | alpha=0.45 | 0.0725   | 0.171          | 2.05E-01       |
|               |              | alpha=0.50 | 0.088    | 0.2395         | 2.73E-01       |
|               |              | alpha=0.52 | 0.3855   | 0.2715         | 0.3045         |
|               |              | alpha=0.55 | 0.3945   | 0.313          | 0.3535         |
|               | p=0.1, m=8   | std        | 12.939   | 305.9          | 2.08E+05       |
|               |              | alpha=0.20 | 0.009    | 0.005          | 7.00E-03       |
|               |              | alpha=0.25 | 0.019    | 0.0135         | 1.70E-02       |
|               |              | alpha=0.30 | 0.0305   | 0.034          | 3.85E-02       |
|               |              | alpha=0.35 | 0.0405   | 0.0595         | 6.60E-02       |
|               |              | alpha=0.40 | 0.054    | 0.0925         | 1.03E-01       |
|               |              | alpha=0.45 | 0.069    | 0.1435         | 1.56E-01       |
|               |              | alpha=0.50 | 0.081    | 0.209          | 2.27E-01       |
|               |              | alpha=0.52 | 0.2795   | 0.2355         | 0.253          |
|               |              | alpha=0.55 | 0.2945   | 0.2785         | 0.299          |
|               | p=0.15, m=10 | std        | 1.67E+01 | 522.41         | 5.91E+05       |
|               |              | alpha=0.20 | 9.50E-03 | 0.0085         | 1.00E-02       |
|               |              | alpha=0.25 | 2.00E-02 | 0.0175         | 2.10E-02       |
|               |              | alpha=0.30 | 3.20E-02 | 0.035          | 4.00E-02       |
|               |              | alpha=0.35 | 4.55E-02 | 0.057          | 6.45E-02       |
|               |              | alpha=0.40 | 5.75E-02 | 0.087          | 9.90E-02       |
|               |              | alpha=0.45 | 7.25E-02 | 0.1375         | 1.48E-01       |
|               |              | alpha=0.50 | 8.30E-02 | 0.198          | 2.14E-01       |
|               |              | alpha=0.52 | 0.2605   | 0.232          | 2.46E-01       |

|               |             |            |          |        |          |
|---------------|-------------|------------|----------|--------|----------|
|               |             | alpha=0.55 | 0.2685   | 0.284  | 0.304    |
| n=50, t=1950  | p=0.05, m=3 | std        | 6.0557   | 62.854 | 9.57E+03 |
|               |             | alpha=0.20 | 0.012    | 0.018  | 4.65E-02 |
|               |             | alpha=0.25 | 0.0215   | 0.043  | 9.05E-02 |
|               |             | alpha=0.30 | 0.031    | 0.1005 | 1.46E-01 |
|               |             | alpha=0.35 | 0.0435   | 0.1575 | 2.21E-01 |
|               |             | alpha=0.40 | 0.0575   | 0.218  | 2.95E-01 |
|               |             | alpha=0.45 | 0.065    | 0.2815 | 3.76E-01 |
|               |             | alpha=0.50 | 0.0835   | 0.355  | 4.53E-01 |
|               |             | alpha=0.52 | 0.4735   | 0.396  | 0.4755   |
|               |             | alpha=0.55 | 0.488    | 0.4425 | 5.14E-01 |
|               | p=0.1, m=5  | std        | 9.2692   | 150.31 | 5.11E+04 |
|               |             | alpha=0.20 | 0.013    | 0.008  | 1.35E-02 |
|               |             | alpha=0.25 | 0.024    | 0.0295 | 4.55E-02 |
|               |             | alpha=0.30 | 0.0305   | 0.0665 | 8.10E-02 |
|               |             | alpha=0.35 | 0.04     | 0.1115 | 1.28E-01 |
|               |             | alpha=0.40 | 0.053    | 0.161  | 1.86E-01 |
|               |             | alpha=0.45 | 0.0665   | 0.21   | 2.37E-01 |
|               |             | alpha=0.50 | 0.0755   | 0.278  | 3.14E-01 |
|               |             | alpha=0.52 | 0.3715   | 0.31   | 0.3405   |
|               |             | alpha=0.55 | 0.381    | 0.3435 | 0.387    |
|               | p=0.15, m=8 | std        | 1.35E+01 | 341.95 | 2.56E+05 |
|               |             | alpha=0.20 | 1.15E-02 | 0.007  | 9.00E-03 |
|               |             | alpha=0.25 | 2.00E-02 | 0.0185 | 2.00E-02 |
|               |             | alpha=0.30 | 3.10E-02 | 0.033  | 4.15E-02 |
|               |             | alpha=0.35 | 4.05E-02 | 0.06   | 7.10E-02 |
|               |             | alpha=0.40 | 5.65E-02 | 0.0935 | 1.10E-01 |
|               |             | alpha=0.45 | 6.65E-02 | 0.154  | 1.73E-01 |
|               |             | alpha=0.50 | 8.00E-02 | 0.22   | 2.42E-01 |
|               |             | alpha=0.52 | 0.3      | 0.2465 | 0.2685   |
|               |             | alpha=0.55 | 0.313    | 0.294  | 0.324    |
| n=200, t=1800 | p=0.05, m=5 | std        | 8.9991   | 147.44 | 4.82E+04 |
|               |             | alpha=0.20 | 0.0105   | 0.0035 | 1.05E-02 |
|               |             | alpha=0.25 | 0.0235   | 0.025  | 3.65E-02 |
|               |             | alpha=0.30 | 0.045    | 0.0625 | 7.95E-02 |

|  |              |            |          |        |          |
|--|--------------|------------|----------|--------|----------|
|  |              | alpha=0.35 | 0.06     | 0.108  | 1.30E-01 |
|  |              | alpha=0.40 | 0.0695   | 0.15   | 1.80E-01 |
|  |              | alpha=0.45 | 0.0805   | 0.204  | 2.31E-01 |
|  |              | alpha=0.50 | 0.371    | 0.2635 | 2.88E-01 |
|  |              | alpha=0.52 | 0.376    | 0.285  | 0.3105   |
|  |              | alpha=0.55 | 0.38     | 0.3285 | 0.345    |
|  | p=0.1, m=10  | std        | 16.122   | 501.75 | 5.43E+05 |
|  |              | alpha=0.20 | 0.0015   | 0.0005 | 1.00E-03 |
|  |              | alpha=0.25 | 0.0125   | 0.0065 | 1.00E-02 |
|  |              | alpha=0.30 | 0.04     | 0.035  | 4.20E-02 |
|  |              | alpha=0.35 | 0.063    | 0.0725 | 7.95E-02 |
|  |              | alpha=0.40 | 0.0785   | 0.106  | 1.11E-01 |
|  |              | alpha=0.45 | 0.0915   | 0.156  | 1.67E-01 |
|  |              | alpha=0.50 | 0.1015   | 0.221  | 2.35E-01 |
|  |              | alpha=0.52 | 0.2705   | 0.251  | 0.2665   |
|  |              | alpha=0.55 | 0.2745   | 0.2985 | 0.315    |
|  | p=0.15, m=15 | std        | 2.36E+01 | 1110   | 2.62E+06 |
|  |              | alpha=0.20 | 5.00E-04 | 0      | 0.00E+00 |
|  |              | alpha=0.25 | 1.05E-02 | 0.0055 | 7.50E-03 |
|  |              | alpha=0.30 | 3.60E-02 | 0.0325 | 3.55E-02 |
|  |              | alpha=0.35 | 6.65E-02 | 0.07   | 7.50E-02 |
|  |              | alpha=0.40 | 8.50E-02 | 0.1055 | 1.11E-01 |
|  |              | alpha=0.45 | 9.20E-02 | 0.1415 | 1.49E-01 |
|  |              | alpha=0.50 | 9.75E-02 | 0.205  | 2.16E-01 |
|  |              | alpha=0.52 | 0.218    | 0.2395 | 0.2505   |
|  |              | alpha=0.55 | 0.318    | 0.2855 | 0.2985   |
